# Supplementary figures and images for: The Sonoda–Tajima Cell Collection: A Human Genetics Research Resource with Emphasis on South American Indigenous Populations
Source: Oxford University Press journal article supplement (doi:10.1093/gbe/evr014), 2011-01-01

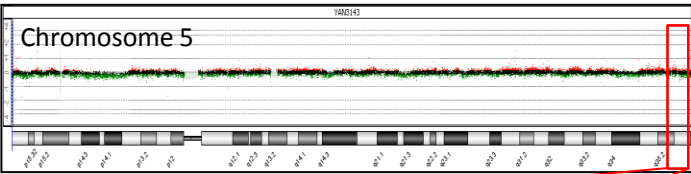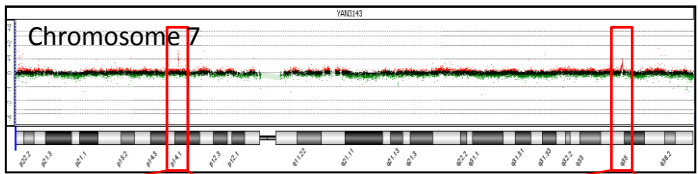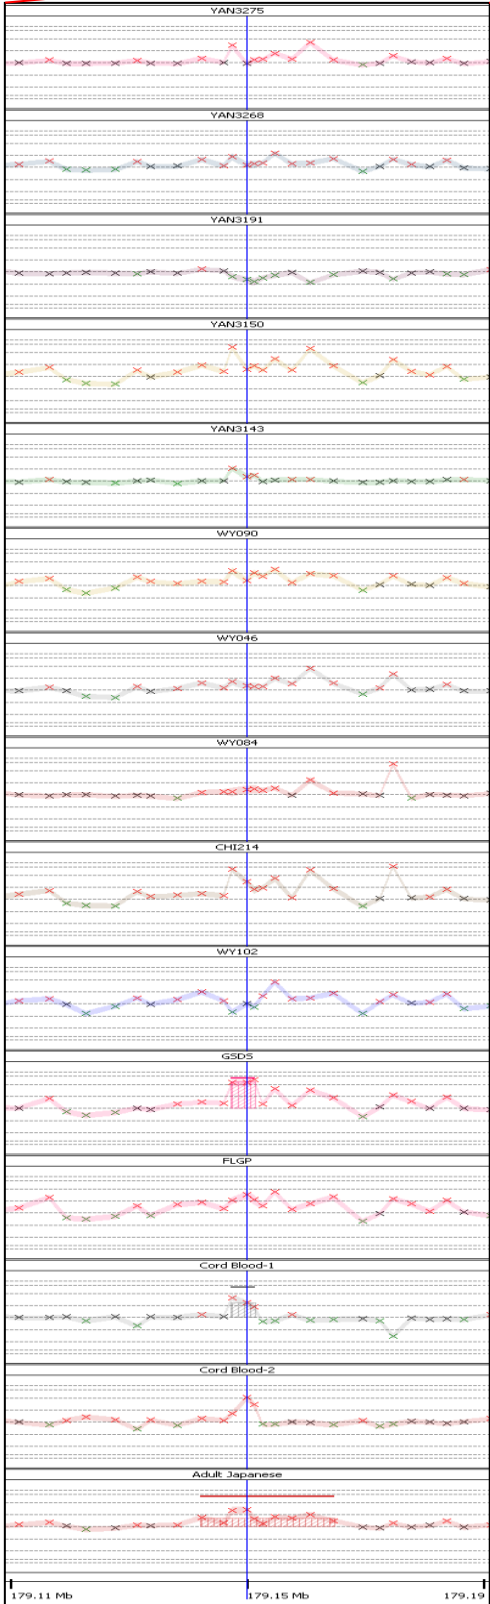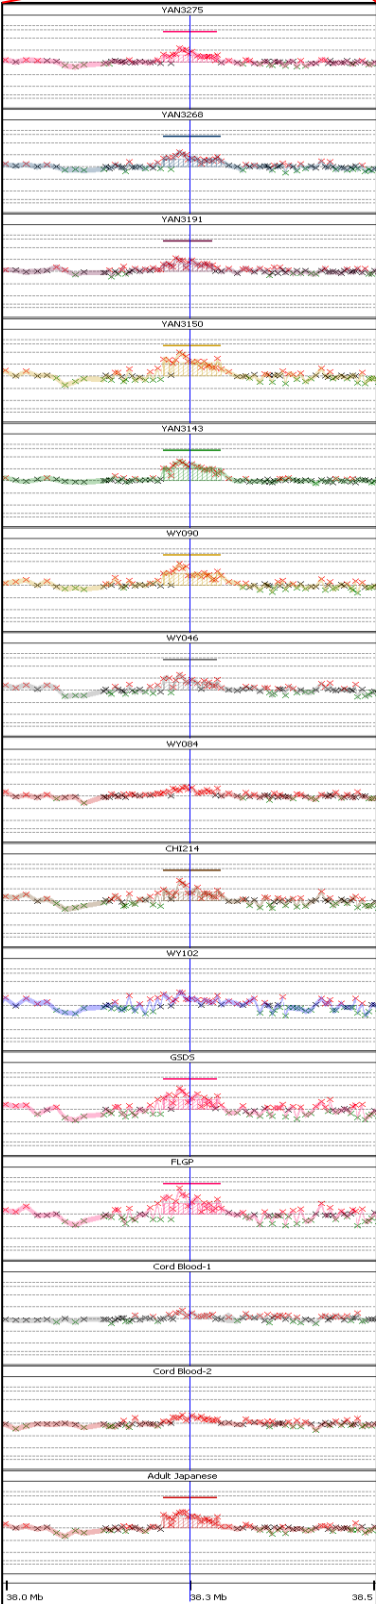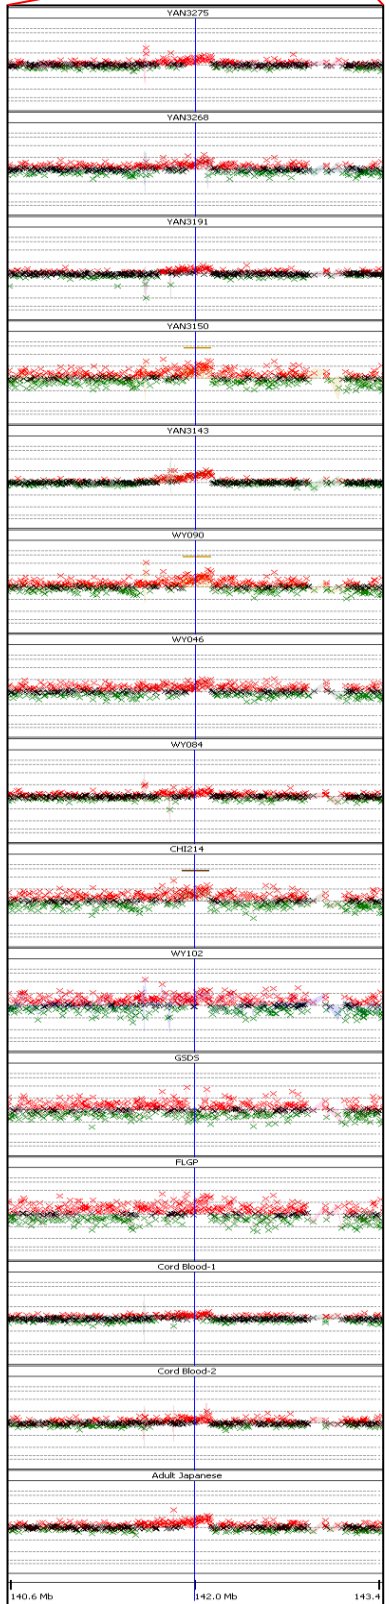

Supplement: evr014_Supplementary_Data.zip [file evr014_Supplementary_Data.zip]

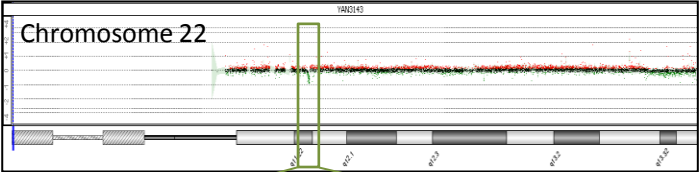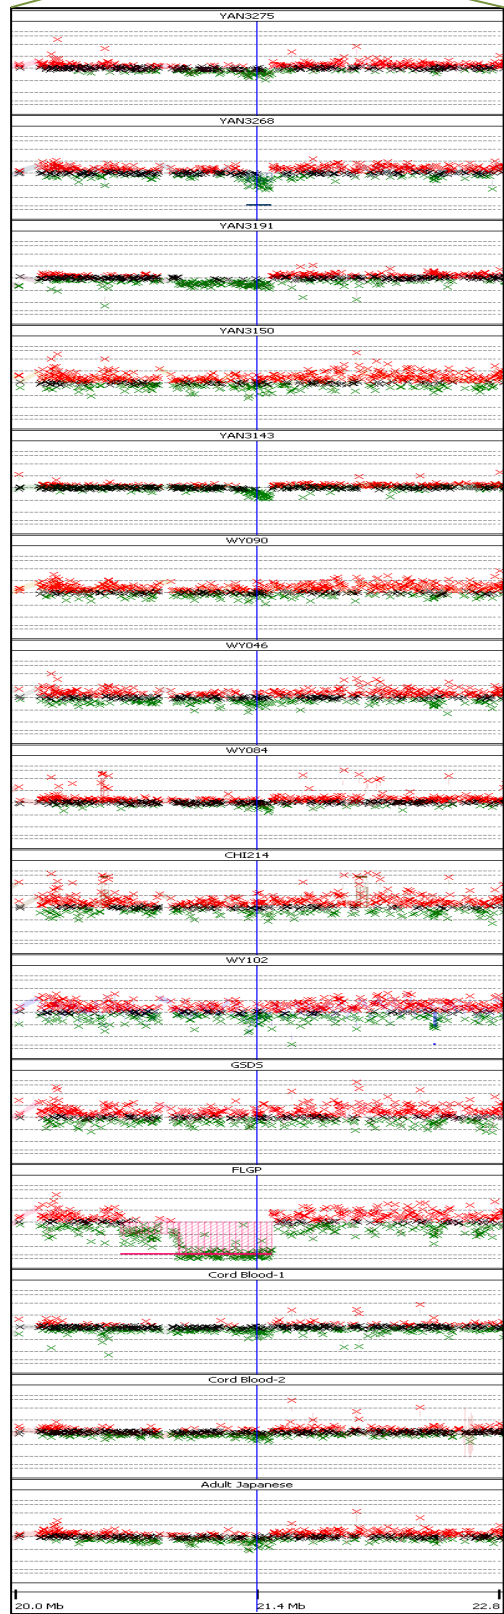

Supplement: evr014_Supplementary_Data.zip [file evr014_Supplementary_Data.zip]

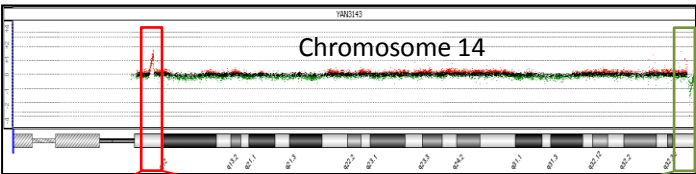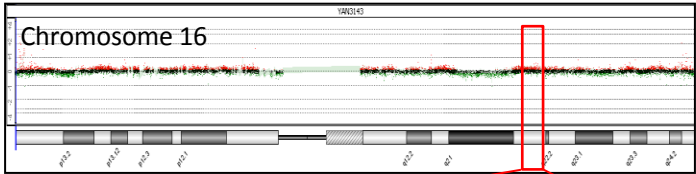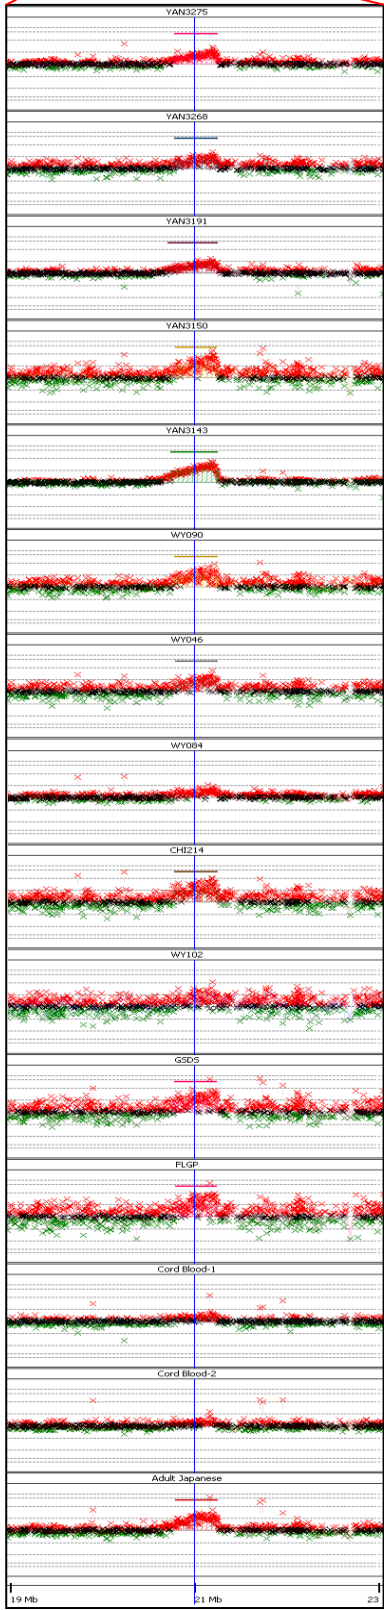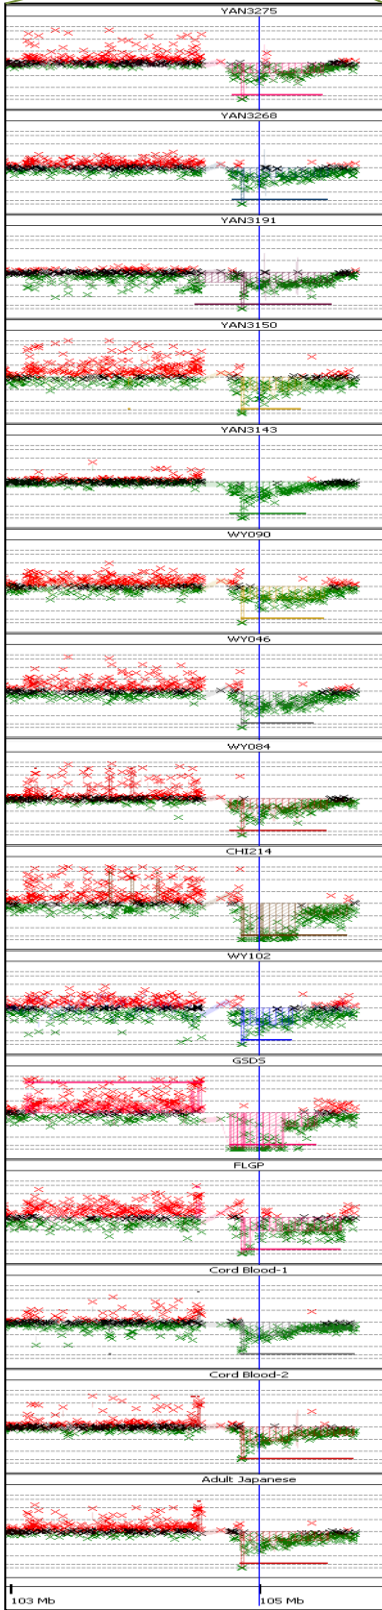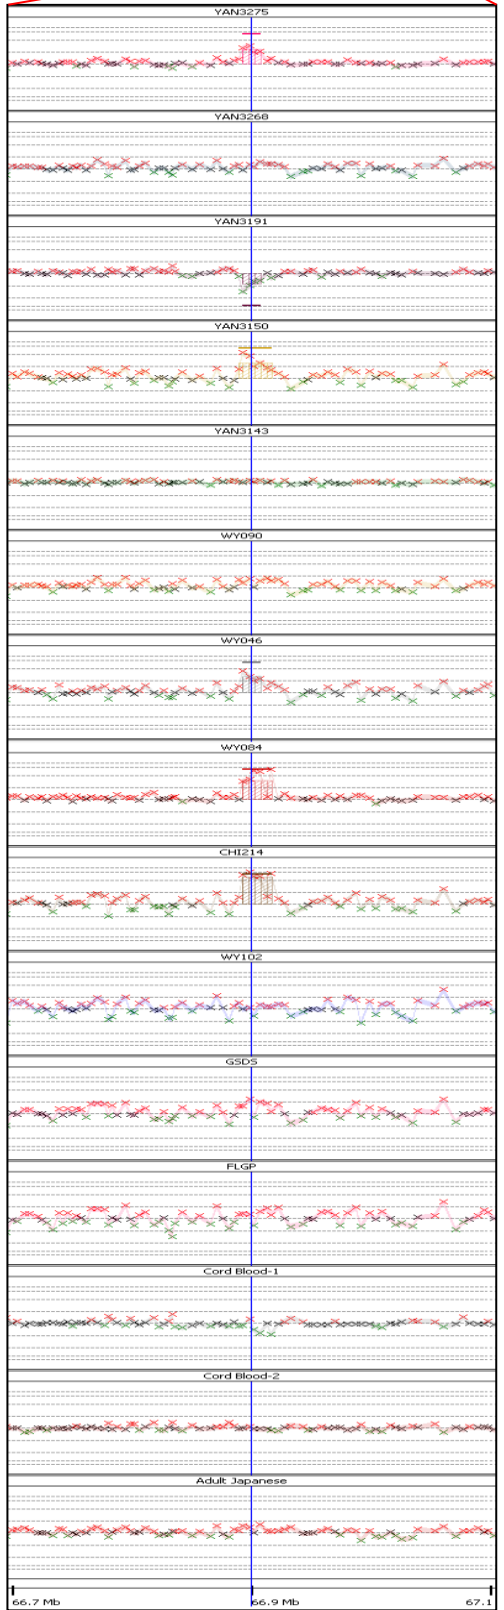

Supplement: evr014_Supplementary_Data.zip [file evr014_Supplementary_Data.zip]

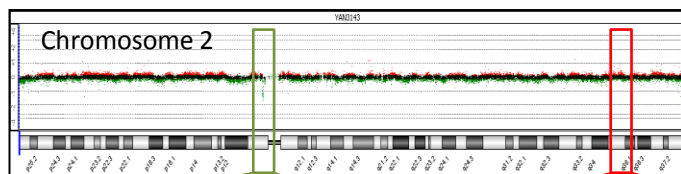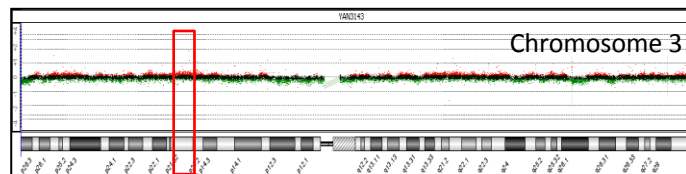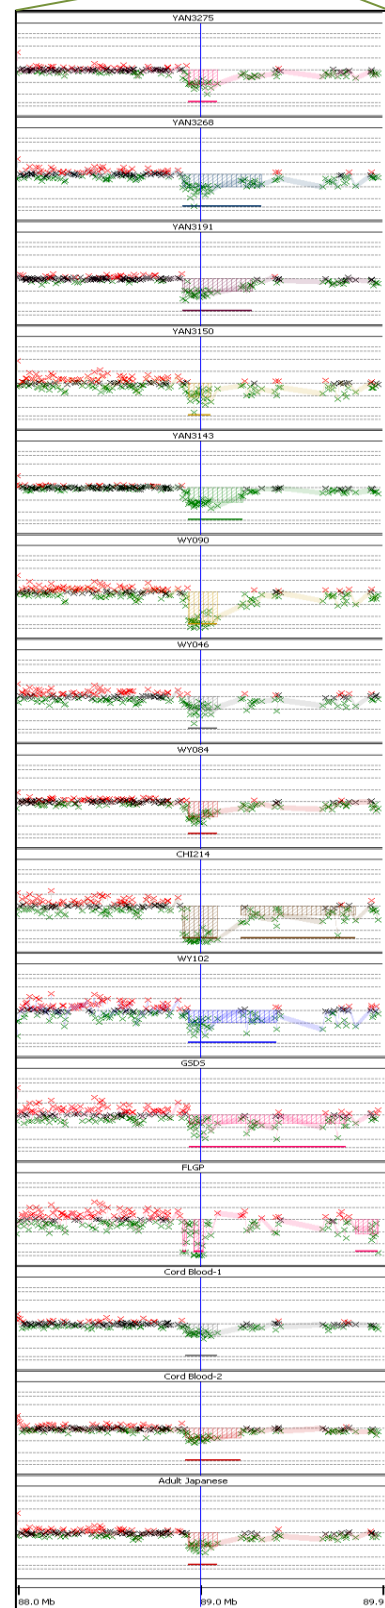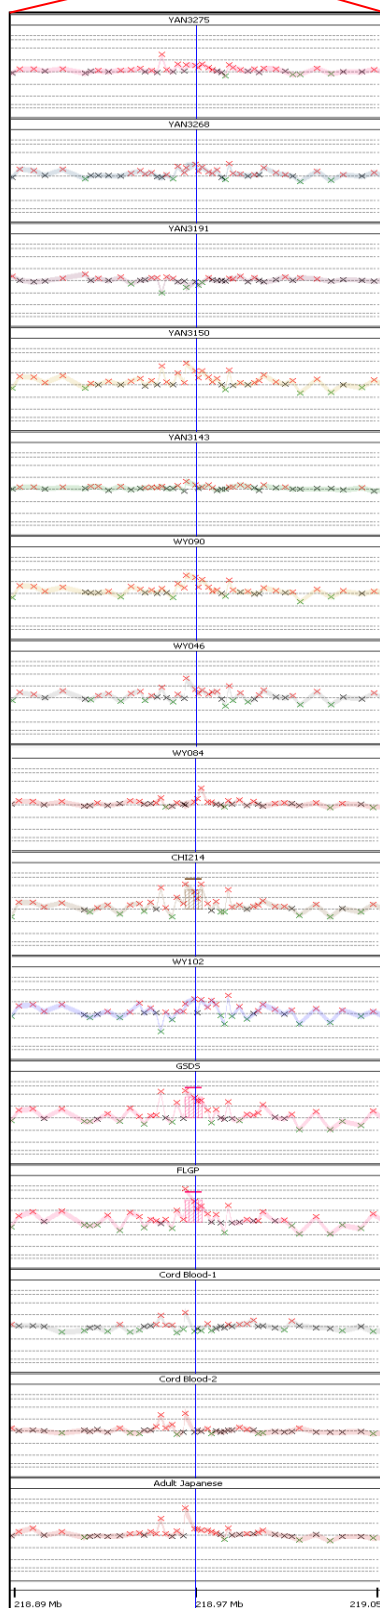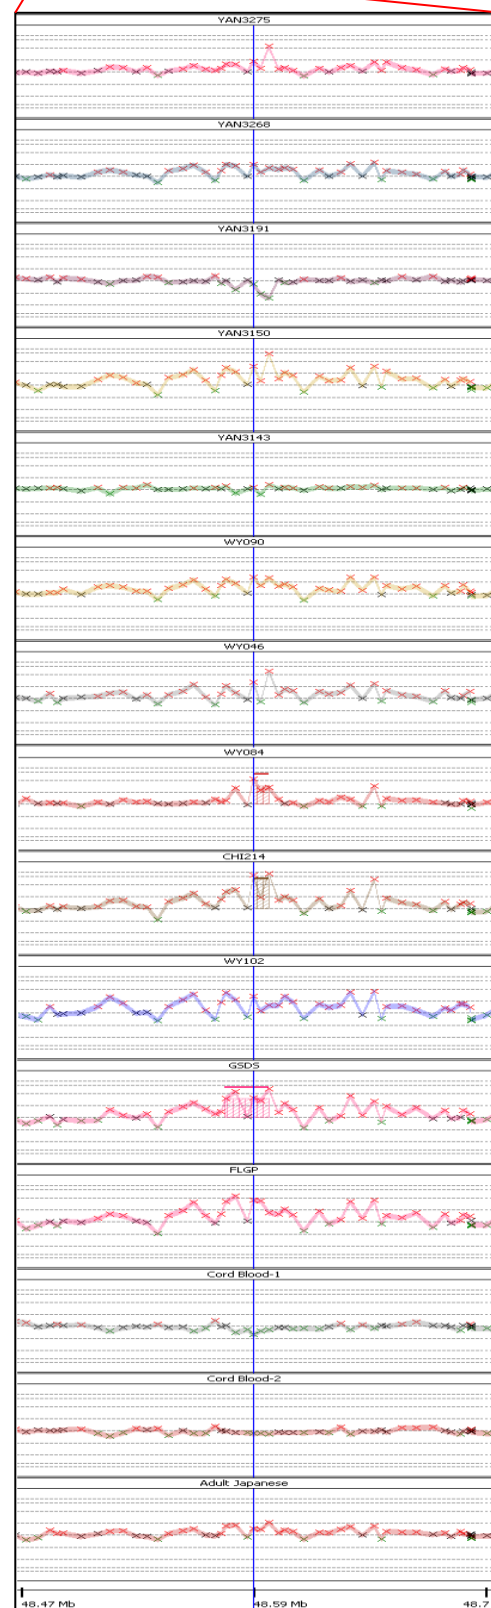

Supplement: evr014_Supplementary_Data.zip [file evr014_Supplementary_Data.zip]
